# Supplementary material
Source: PubMed Central journal article supplement (PMC3930317)
Supplement: ismej2013177x1.pdf [file ismej2013177x1.pdf]

## Supporting Information

### A. Supporting Materials and Methods

### B. Supporting Tables

**Table S1** Effects of block, eCO<sub>2</sub>, eO<sub>3</sub>, eCO<sub>2</sub>+eO<sub>3</sub>, depth and their combinations on soil microbial communities by Adonis analysis

**Table S2.** Significance tests of pairwise dissimilarities of overall microbial community structures between different treatments with three different statistical approaches

**Table S3** Numbers of detected genes involved in carbon, nitrogen, sulfur and phosphorus cycling

**Table S4** Correlations (*p* values) between soil properties or plant yield and signal intensities of functional genes by Mantel analysis in subsoil samples.

### C. Supporting Figures

**Fig. S1** DCA analysis of eCO<sub>2</sub>, eO<sub>3</sub> and eCO<sub>2</sub>+eO<sub>3</sub> effects on the microbial community structure of both surface soil and subsoil samples

**Fig. S2** Maximum-likelihood phylogenetic tree of Rubisco gene sequences detected by GeoChip 3.0

**Fig. S3** Effects of eCO<sub>2</sub>, eO<sub>3</sub>, and eCO<sub>2</sub>+eO<sub>3</sub> on carbon degradation genes detected in the subsoil samples

**Fig. S4** Simplified maximum-likelihood phylogenetic tree of *nifH* gene sequences detected by GeoChip 3.0

**Fig. S5** Normalized signal intensities of key N cycling genes detected under eCO<sub>2</sub>, eO<sub>3</sub>, and eCO<sub>2</sub>+eO<sub>3</sub> and control conditions in the subsoil soil

**Fig. S6** The normalized signal intensities of key P cycling genes (A) and key S cycling genes (B) detected from surface soil (0-5 cm) and subsoil (5-15 cm) samples.

### D. Supporting references

## A. Supporting Materials and Methods

### *Site description and sampling*

This study was conducted at the soybean free-air concentration enrichment (SoyFACE) facility located in Champaign, IL, USA (40°02'N, 88°14'W, 228 m above sea level) (<http://www.soyface.uiuc.edu/index.htm>) in 2008. The 32-ha SoyFACE experiment was established on a farmland that had been cultivated with an annual rotation of soybean, *Glycine max* (L.) Merr. and corn, *Zea mays* L. for more than 25 years, and the soil at the site is a Drummer fine-silty, mixed, mesic Typic Endoaquoll, typical of wet, dark-colored 'prairie soils' in northern and central Illinois (Pujol Pereira et al 2011). More soil background properties, including soil pH, moisture, Bray P, K, Ca, and Mg were previously documented (Peralta and Wander 2008). SoyFACE is designed to discover the effects of atmospheric change on the agronomy, productivity and ecology of Midwestern agro-ecosystems planted in a typical corn-soy rotation. The experiment was a randomized complete block design (n = 4) with each block containing four treatments: (i) ambient CO<sub>2</sub> (~400 ppm in 2008) and O<sub>3</sub> (~37.9 ppb in 2008), (ii) elevated CO<sub>2</sub> (~550 ppm), (iii) elevated O<sub>3</sub> (~ 61.3 ppb in 2008), and (iv) a combination of elevated CO<sub>2</sub> and O<sub>3</sub> (~550 ppm CO<sub>2</sub> and ~61.3 ppb O<sub>3</sub>). Concentrations of CO<sub>2</sub> and O<sub>3</sub> were controlled by an adjustable segmented ring encircling each plot area that released high velocity gas just above the surface of the crop canopy. A total of 96 soil samples were collected in October 2008 from four soybean (*Glycine max* Merr.) grown plots under each of four treatments at both surface soil (0-5 cm) and subsoil (5-15 cm) layers with 48 samples for each soil layer, 12 samples for each treatment, and three subsamples for each plot. All soil samples were immediately transferred to the laboratory and stored at -80°C until DNA extraction or soil property analyses.

### *Crop yield and soil property analysis*

Annual crop yield data were collected for each plot as previously described (Morgan et al 2005) and previously reported (Twine et al 2013). To estimate the historical effects of elevated CO<sub>2</sub> on seed yield production prior to the time of our sampling, soybean yield data from 2004 and 2006 were averaged. Soil NO<sub>3</sub>-N and NH<sub>4</sub>-N were extracted with 1 M KCl solution and quantified by a Flow Injection Autoanalyzer (LACHAT 1994). Soil organic carbon and total N were determined using a LECO Truspec dry combustion carbon analyzer (Nelson and Sommers 1996).

#### *Microbial community DNA extraction, purification and quantitation*

Soil DNA was extracted by freeze-grinding mechanical lysis as described previously (Zhou et al 1996), and was purified using a low melting agarose gel followed by phenol extraction for 96 soil samples collected in October 2008. DNA quality was assessed by the ratios of 260 nm/280 nm, and 260/230 nm using a NanoDrop ND-1000 Spectrophotometer (NanoDrop Technologies Inc., Wilmington, DE), and it should meet the following criteria: 260 nm/280 nm > 1.70, and 260 nm/230 nm > 1.80. The final soil DNA concentrations were quantified by the PicoGreen method (Ahn et al 1996) using a FLUOstar Optima (BMG Labtech, Jena, Germany).

#### *GeoChip analysis*

A comprehensive functional gene array, GeoChip 3.0 was used to analyze the functional composition, structure and metabolic potential of all 96 microbial communities. GeoChip 3.0 contains > 28,000 probes covering approximately 57,000 gene variants from 292 functional gene families involved in carbon (C), nitrogen (N), phosphorus (P) and sulfur (S) cycling, energy metabolism, antibiotic resistance, metal resistance and organic contaminant degradation. It also has several other distinct features, such as a common oligonucleotide as the universal standard (CORS) for data normalization and comparison (Liang et al 2010), a software package for data management, and the *gyrB* gene for phylogenetic analysis (He et al 2010a).

##### *a. Target amplification*

In order to produce consistent hybridizations from all samples, a whole community genome amplification (WCGA) was used to generate approximately 3.0 µg of DNA with 50 ng purified

DNA as the template using the TempliPhi Kit (GE Healthcare, Piscataway, NJ) following the manufacturer's instructions (Wu et al 2006). Also, single-strand binding protein (267 ng  $\mu\text{L}^{-1}$ ) and spermidine (0.1 mM) were added to the reaction mix to improve the amplification efficiency. The reactions were incubated at 30°C for 3 hours and stopped by heating the mixtures at 65°C for 10 min.

b. Target labeling

After amplification, all products were labeled with the fluorescent dye Cy-5 using random priming method as follows. First, the whole amplified products were mixed with 20  $\mu\text{L}$  random primers, denatured at 99.9 °C for 5 min, and then immediately chilled on ice. Following denaturation, the labeling master mix containing 2.5  $\mu\text{L}$  dNTP (5 mM dAGC-TP, 2.5 mM dTTP), 1  $\mu\text{L}$  Cy-5 dUTP (Amersham, Piscataway, NJ), 80 U of the large Klenow fragment (Invitrogen, Carlsbad, CA), and 2.5  $\mu\text{L}$  water were added, incubated at 37 °C for 3 hours, and heated at 95°C for 3 min. Labeled DNA was purified using the QIA quick purification kit (Qiagen, Valencia, CA) according to the manufacturer's instructions, measured on a NanoDrop ND-1000 spectrophotometer (NanoDrop Technologies Inc., Wilmington, DE), and then dried down in a SpeedVac (ThermoSavant, Milford, MA) at 45°C for 45 min.

c. GeoChip hybridization and imaging processing

The labeled target was resuspended in 120  $\mu\text{L}$  hybridization solution containing 50% formamide, 3 x SSC, 10.0  $\mu\text{g}$  of unlabeled herring sperm DNA (Promega, Madison, WI), and 0.1% SDS, and the mix was denatured at 95°C for 5 min and kept at 50°C until it was deposited directly onto a microarray. Hybridizations were performed with a TECAN Hybridization Station HS4800 Pro (TECAN, Durham, NC, US) according to the manufacturer's recommended method. After washing and drying, the microarray was scanned by ScanArray Express Microarray Scanner (Perkin Elmer, Boston, MA) at 633 nm using a laser power of 90% and a photomultiplier tube (PMT) gain of 75%. The ImaGene version 6.0 (Biodiscovery, El Segundo, CA) was then used to determine the intensity of each spot, and identify poor-quality spots.

d. Data pre-processing

Raw data from ImaGene were submitted to Microarray Data Manager in our website (<http://ieg.ou.edu/microarray/>) and analyzed using the data analysis pipeline with the following major steps: (i) The spots flagged as 1 or 3 by Imagen and with a signal to noise ratio (SNR) less than 2.0 (He and Zhou 2008) were removed as poor-quality spots; (ii) After removing the

bad spots, normalized intensity of each spot was calculated by dividing the signal intensity of each spot by the mean intensity of the microarray; (iii) If any of replicates had (signal–mean) more than two times the standard deviation, this replicate was moved as an outlier. This process continued until no such replicates were identified; (iv) At least 0.34 time of the final positive spots (probes), or a minimum of two spots was required for each gene; and (v) If a probe appeared in two or fewer samples among the total of 12 samples for each treatment condition, it was removed for data reliability (He et al 2010b).

### *Statistical analysis*

Preprocessed GeoChip data were further analyzed using different statistical methods as previously described (He et al 2010b).

#### a. Analysis of Variance (ANOVA)

Analysis of variance (ANOVA) test was used to examine the differences among different treatments: ambient (the control), elevated CO<sub>2</sub> (eCO<sub>2</sub>), elevated O<sub>3</sub> (eO<sub>3</sub>), and their combination (CO<sub>2</sub>+eO<sub>3</sub>). The *F* value from *F*-test in ANOVA measures the ratio of the variance between-treatments and the variance within-treatments, and thus the relevant *p* value shows if the probability of the variance between-treatments equals the variance within-treatments. If *p* value is less than the significance level (e.g., 0.05), it means the difference among treatments significantly bigger the difference within treatments, indicating the treatments are significantly different. The ANOVA model in this study was set as:  $Y \sim \text{CO}_2 + \text{O}_3 + \text{CO}_2:\text{O}_3$ . For ANOVA test of functional genes, signal intensities of multiple probes from each functional gene in each sample were summed together, and then each functional gene was performed individually. The “aov” function in R software version 2.9.1 was used to implement the ANOVA test.

#### b. Multivariate and direct gradient analysis

Detrended correspondence analysis (DCA) was used to determine the overall functional changes in the microbial community, which was implemented by the Vegan package in R software. DCA is an ordination technique that uses detrending to remove the arch effect, where the data points are organized in a horseshoe-like shape, in correspondence analysis (Hill and Gauch 1980).

Different datasets of microbial communities generated with different analytical methods

were used to examine whether different treatments (e.g., ambient, eCO<sub>2</sub>, eO<sub>3</sub>, eCO<sub>2</sub>+eO<sub>3</sub>) have significant effects on soil microbial communities. Typically, there is some difficulty for all datasets to meet the assumptions (e.g., normality, equal variances, independence) of parametric statistics. Thus, in this study, three different non-parametric analyses for multivariate data were used: analysis of similarities (ANOSIM) (Clarke 1993), non-parametric multivariate analysis of variance (permanova or adonis) using distance matrices (Anderson 2001), and multi-response permutation procedure (MRPP). We used Jaccard (non-quantitate) and Bray-Curtis (quantitate) similarity indexes to calculate distance matrix from GeoChip hybridization data for ANOSIM, adonis and MRPP analyses (McCune and Grace 2002). All three methods are based on dissimilarities among samples and their rank order in different ways to calculate test statistics, and the Monte Carlo permutation is used to test the significance of statistics. All three procedures (anosim, adonis and mrpp) were performed by the Vegan package in R (R Development Core Team 2011).

#### c. Mantel test

To elucidate the inter-relationships between soil geochemical variables and the abundance of functional genes of microbial community detected by GeoChip, the Mantel test was employed. Mantel test is an appropriate statistic method to measure the correlation between dissimilarity matrices and the significance of the statistic is evaluated by permuting the matrixes (Borcard et al 1992). The geochemical data were standardized to zero mean and unit deviation before calculation. The Bray-Curtis distance was used to construct the dissimilarity matrixes of communities and environmental variables respectively. All Mantel analyses were performed by functions in the Vegan package in R (R Development Core Team 2011).

## B. Supporting Tables

**Table S1** Effects of block, eCO<sub>2</sub>, eO<sub>3</sub>, eCO<sub>2</sub>+eO<sub>3</sub>, depth and their combinations on soil microbial communities by Adonis analysis. The statistical model of adonis is  $Y = (CO_2 + O_3 + Block + Depth)^2$ , where Y is the mean response of the community by CO<sub>2</sub>, O<sub>3</sub>, block, depth and their interactions.

|                                              | F-value | p-value | Contribution % |
|----------------------------------------------|---------|---------|----------------|
| Block                                        | 2.36    | 0.001   | 5.2%           |
| Depth                                        | 2.97    | 0.001   | 3.8%           |
| CO <sub>2</sub>                              | 2.95    | 0.002   | 3.5%           |
| O <sub>3</sub>                               | 2.57    | 0.001   | 2.5%           |
| CO <sub>2</sub> :O <sub>3</sub>              | 2.83    | 0.001   | 3.1%           |
| Block:CO <sub>2</sub>                        | 1.74    | 0.001   | 4.2%           |
| Block:O <sub>3</sub>                         | 1.59    | 0.004   | 3.8%           |
| Block:Depth                                  | 1.59    | 0.002   | 3.9%           |
| CO <sub>2</sub> :Depth                       | 2.96    | 0.001   | 2.5%           |
| O <sub>3</sub> :Depth                        | 2.56    | 0.001   | 2.2%           |
| Block:CO <sub>2</sub> :O <sub>3</sub>        | 2.19    | 0.001   | 5.3%           |
| Block:CO <sub>2</sub> :Depth                 | 1.61    | 0.001   | 3.9%           |
| Block:O <sub>3</sub> :Depth                  | 1.57    | 0.002   | 3.8%           |
| CO <sub>2</sub> :O <sub>3</sub> :Depth       | 1.95    | 0.006   | 1.6%           |
| Block:CO <sub>2</sub> :O <sub>3</sub> :Depth | 1.55    | 0.003   | 3.8%           |
| Residuals                                    |         |         | 46.9%          |

**Table S2.** Significance tests of pairwise dissimilarities of overall microbial community structures among between different treatments with three different statistical approaches. **Bond** p values indicate no significant ( $p > 0.05$ ) differences between those two treatments.

|                                                       | ANOISM* |              | adonis** |              | MRPP***  |              |
|-------------------------------------------------------|---------|--------------|----------|--------------|----------|--------------|
|                                                       | R       | p            | F        | p            | $\delta$ | p            |
| <i>Surface soil (0-5 cm)</i>                          |         |              |          |              |          |              |
| eCO <sub>2</sub> vs ambient                           | 0.451   | 0.007        | 0.313    | 0.002        | 0.554    | 0.003        |
| eO <sub>3</sub> vs ambient                            | 0.400   | 0.020        | 0.279    | 0.027        | 0.584    | 0.027        |
| eCO <sub>2</sub> +eO <sub>3</sub> vs ambient          | 0.310   | 0.028        | 0.251    | <b>0.066</b> | 0.576    | <b>0.052</b> |
| eCO <sub>2</sub> vs eO <sub>3</sub>                   | 0.389   | 0.003        | 0.305    | 0.007        | 0.566    | 0.003        |
| eCO <sub>2</sub> vs eCO <sub>2</sub> +eO <sub>3</sub> | 0.491   | 0.004        | 0.342    | 0.001        | 0.573    | 0.001        |
| eO <sub>3</sub> vs eCO <sub>2</sub> +eO <sub>3</sub>  | 0.366   | 0.015        | 0.275    | 0.036        | 0.595    | 0.022        |
| <i>Subsoil (5-15 cm)</i>                              |         |              |          |              |          |              |
| eCO <sub>2</sub> vs ambient                           | 0.400   | 0.004        | 0.283    | 0.007        | 0.604    | 0.003        |
| eO <sub>3</sub> vs ambient                            | 0.249   | <b>0.069</b> | 0.219    | <b>0.103</b> | 0.591    | <b>0.067</b> |
| eCO <sub>2</sub> +eO <sub>3</sub> vs ambient          | 0.219   | <b>0.125</b> | 0.249    | <b>0.065</b> | 0.614    | <b>0.067</b> |
| eCO <sub>2</sub> vs eO <sub>3</sub>                   | 0.390   | 0.005        | 0.279    | 0.002        | 0.576    | 0.005        |
| eCO <sub>2</sub> vs eCO <sub>2</sub> +eO <sub>3</sub> | 0.292   | 0.028        | 0.261    | 0.022        | 0.599    | 0.016        |
| eO <sub>3</sub> vs eCO <sub>2</sub> +eO <sub>3</sub>  | 0.272   | 0.041        | 0.253    | 0.058        | 0.586    | 0.048        |

\*Analysis of similarities (ANOSIM); \*\*Non-parametric multivariate analysis of variance (MANOVA) with the adonis function; \*\*\*Multi-response permutation procedure (MRPP).

| Table S3 Number of detected genes involved in carbon, nitrogen, sulfur and phosphorus cycling |                       |      |      |         |         |                   |      |         |      |
|-----------------------------------------------------------------------------------------------|-----------------------|------|------|---------|---------|-------------------|------|---------|------|
|                                                                                               | Surface soil (0-5 cm) |      |      |         |         | Subsoil (5-15 cm) |      |         |      |
| Gene/enzyme                                                                                   | Ambient               | eCO2 | eO3  | eCO2+O3 | Ambient | eCO2              | eO3  | eCO2+O3 |      |
| CODH                                                                                          | 8                     | 9    | 9    | 13      | 13      | 14                | 11   | 12      |      |
| <i>pcc</i>                                                                                    | 63                    | 73   | 64   | 66      | 75      | 77                | 63   | 60      |      |
| <i>rbcL</i>                                                                                   | 31                    | 41   | 39   | 34      | 42      | 36                | 42   | 33      |      |
| <i>amyA</i>                                                                                   | 56                    | 62   | 57   | 51      | 69      | 54                | 60   | 59      |      |
| acetylglucosaminidase                                                                         | 8                     | 11   | 6    | 13      | 12      | 10                | 11   | 10      |      |
| <i>ara</i>                                                                                    | 15                    | 18   | 20   | 18      | 20      | 23                | 23   | 23      |      |
| <i>ara</i> (fungi)                                                                            | 10                    | 11   | 10   | 12      | 10      | 9                 | 9    | 10      |      |
| cellobiase                                                                                    | 16                    | 19   | 12   | 15      | 13      | 14                | 13   | 16      |      |
| endochitinase                                                                                 | 31                    | 42   | 33   | 40      | 33      | 36                | 38   | 29      |      |
| endoglucanase                                                                                 | 4                     | 6    | 4    | 7       | 8       | 7                 | 3    | 5       |      |
| exochitinase                                                                                  | 2                     | 3    | 3    | 3       | 3       | 2                 | 3    | 3       |      |
| exoglucanase                                                                                  | 8                     | 9    | 9    | 8       | 9       | 9                 | 8    | 10      |      |
| glucoamylase                                                                                  | 8                     | 8    | 8    | 9       | 7       | 8                 | 9    | 10      |      |
| <i>pulA</i>                                                                                   | 12                    | 28   | 14   | 21      | 26      | 18                | 20   | 25      |      |
| <i>vdh</i>                                                                                    | 4                     | 4    | 1    | 4       | 5       | 4                 | 4    | 5       |      |
| <i>vanA</i>                                                                                   | 28                    | 30   | 27   | 30      | 34      | 29                | 33   | 28      |      |
| <i>limEH</i>                                                                                  | 6                     | 6    | 6    | 8       | 9       | 6                 | 6    | 8       |      |
| xylanase                                                                                      | 11                    | 14   | 14   | 17      | 12      | 16                | 13   | 16      |      |
| <i>glx</i>                                                                                    | 6                     | 5    | 5    | 6       | 5       | 6                 | 6    | 6       |      |
| <i>lip</i>                                                                                    | 9                     | 11   | 12   | 9       | 11      | 10                | 12   | 8       |      |
| <i>mnp</i>                                                                                    | 5                     | 7    | 7    | 6       | 8       | 9                 | 7    | 7       |      |
| phenol_oxidase                                                                                | 24                    | 33   | 31   | 30      | 29      | 35                | 32   | 28      |      |
| Carbon cycling                                                                                | 365                   | 450  | 391  | 420     | 453     | 432               | 426  | 411     |      |
| <i>amoA</i>                                                                                   | 7                     | 12   | 6    | 7       | 12      | 5                 | 9    | 4       |      |
| <i>gdh</i>                                                                                    | 4                     | 4    | 4    | 2       | 6       | 3                 | 4    | 5       |      |
| <i>napA</i>                                                                                   | 5                     | 9    | 8    | 10      | 12      | 15                | 10   | 11      |      |
| <i>narG</i>                                                                                   | 58                    | 73   | 63   | 58      | 78      | 70                | 68   | 74      |      |
| <i>nasA</i>                                                                                   | 21                    | 26   | 20   | 21      | 27      | 26                | 31   | 24      |      |
| <i>nifH</i>                                                                                   | 123                   | 136  | 116  | 131     | 146     | 121               | 147  | 124     |      |
| <i>nirK</i>                                                                                   | 57                    | 77   | 53   | 57      | 70      | 52                | 59   | 63      |      |
| <i>nirS</i>                                                                                   | 40                    | 54   | 35   | 50      | 48      | 55                | 43   | 48      |      |
| <i>norB</i>                                                                                   | 14                    | 21   | 17   | 20      | 18      | 20                | 17   | 22      |      |
| <i>nosZ</i>                                                                                   | 41                    | 54   | 44   | 45      | 43      | 46                | 48   | 42      |      |
| <i>nrfA</i>                                                                                   | 19                    | 16   | 19   | 21      | 19      | 18                | 17   | 15      |      |
| <i>ureC</i>                                                                                   | 45                    | 49   | 51   | 19      | 57      | 52                | 50   | 48      |      |
| Nitrogen cycling                                                                              | 434                   | 531  | 436  | 441     | 536     | 483               | 503  | 480     |      |
| phytase                                                                                       | 2                     | 3    | 3    | 3       | 3       | 3                 | 1    | 4       |      |
| <i>ppk</i>                                                                                    | 21                    | 27   | 26   | 28      | 31      | 26                | 24   | 27      |      |
| <i>ppx</i>                                                                                    | 54                    | 62   | 59   | 62      | 69      | 50                | 55   | 54      |      |
| Phosphorus cycling                                                                            | 77                    | 92   | 88   | 93      | 103     | 79                | 80   | 85      |      |
| <i>dsrA</i>                                                                                   | 76                    | 104  | 82   | 82      | 98      | 99                | 82   | 85      |      |
| <i>dsrB</i>                                                                                   | 35                    | 40   | 33   | 35      | 34      | 44                | 34   | 32      |      |
| <i>sox</i>                                                                                    | 47                    | 51   | 48   | 47      | 49      | 49                | 47   | 48      |      |
| Sulphur cycling                                                                               | 158                   | 195  | 163  | 164     | 181     | 192               | 163  | 165     |      |
| Total                                                                                         | 1034                  | 1268 | 1078 | 1118    | 0       | 1273              | 1186 | 1172    | 1141 |

**Table S4** Correlations (*p* values) between soil properties or plant yield and signal intensities of functional genes by Mantel analysis of subsoil (5-15 cm) samples. Bold face indicates significantly changed *p* values (*p* < 0.05).

| Gene/enzyme   | Functional process | NO <sub>3</sub> -N | NH <sub>4</sub> -N | TN           | TC           | C/N   | Yield        |
|---------------|--------------------|--------------------|--------------------|--------------|--------------|-------|--------------|
| All detected  |                    | 0.621              | 0.574              | 0.892        | 0.843        | 0.822 | 0.457        |
| FTHFS         | Acetogenesis       | 0.318              | 0.925              | <b>0.035</b> | <b>0.024</b> | 0.261 | 0.151        |
| <i>amyA</i>   | C degradation      | 0.509              | 0.860              | 0.184        | 0.206        | 0.503 | <b>0.041</b> |
| <i>pulA</i>   | C degradation      | 0.821              | <b>0.041</b>       | 0.627        | 0.858        | 0.145 | 0.620        |
| <i>gdh</i>    | Ammonification     | <b>0.016</b>       | 0.391              | 0.059        | <b>0.010</b> | 0.234 | 0.234        |
| <i>nrfA</i>   | N reduction        | 0.765              | <b>0.004</b>       | 0.679        | 0.921        | 0.430 | 0.619        |
| <i>ureC</i>   | Ammonification     | 0.168              | 0.543              | 0.207        | 0.117        | 0.841 | <b>0.023</b> |
| <i>ppk</i>    | P utilization      | <b>0.041</b>       | 0.299              | 0.761        | 0.267        | 0.775 | 0.066        |
| <i>sox</i>    | Sulphur oxidation  | 0.525              | <b>0.001</b>       | 0.969        | 0.847        | 0.990 | 0.706        |
| <i>cnrA</i>   | Cobalt & Nickel    | 0.102              | 0.603              | <b>0.006</b> | <b>0.033</b> | 0.083 | 0.163        |
| <i>cusF</i>   | Copper             | 0.141              | 0.543              | 0.078        | <b>0.030</b> | 0.301 | 0.636        |
| <i>metC</i>   | Mercury            | 0.542              | <b>0.005</b>       | 0.986        | 0.827        | 0.874 | 0.361        |
| <i>nreB</i>   | Nickel             | 0.496              | <b>0.005</b>       | 0.878        | 0.594        | 0.653 | 0.526        |
| <i>terD</i>   | Tellurium          | 0.140              | 0.475              | <b>0.028</b> | 0.063        | 0.071 | 0.232        |
| <i>amiE</i>   | Aromatics          | 0.387              | 0.716              | <b>0.029</b> | <b>0.034</b> | 0.396 | 0.117        |
| <i>bphA</i>   | Aromatics          | 0.864              | <b>0.010</b>       | 0.951        | 0.756        | 0.972 | 0.203        |
| <i>bphB</i>   | Aromatics          | 0.413              | 0.430              | <b>0.043</b> | 0.071        | 0.100 | 0.433        |
| <i>cumB</i>   | Aromatics          | <b>0.049</b>       | 0.122              | 0.495        | 0.245        | 0.218 | 0.108        |
| <i>ebdABC</i> | Aromatics          | 0.220              | 0.237              | 0.066        | <b>0.044</b> | 0.135 | 0.334        |
| <i>hcaB</i>   | Aromatics          | 0.220              | 0.751              | 0.066        | <b>0.029</b> | 0.173 | 0.385        |
| <i>hdnO</i>   | Aromatics          | 0.123              | 0.933              | <b>0.004</b> | <b>0.030</b> | 0.111 | 0.106        |
| <i>mdlB</i>   | Aromatics          | 0.830              | <b>0.006</b>       | 0.889        | 0.850        | 0.855 | 0.559        |
| <i>nagI</i>   | Aromatics          | 0.300              | <b>0.042</b>       | 0.063        | <b>0.041</b> | 0.346 | 0.708        |
| <i>pheA</i>   | Aromatics          | 0.105              | 0.563              | 0.135        | <b>0.048</b> | 0.365 | 0.190        |
| <i>phtA</i>   | Aromatics          | 0.111              | 0.906              | 0.286        | 0.411        | 0.610 | <b>0.003</b> |
| <i>tdnB</i>   | Aromatics          | <b>0.048</b>       | 0.168              | 0.573        | 0.346        | 0.212 | 0.109        |
| <i>atzB</i>   | Herbicides         | 0.449              | 0.724              | 0.207        | 0.527        | 0.498 | <b>0.003</b> |
| <i>phn</i>    | Herbicides         | 0.295              | 0.488              | 0.511        | 0.161        | 0.354 | <b>0.012</b> |
| <i>trzE</i>   | Herbicides         | 0.210              | 0.765              | 0.061        | <b>0.045</b> | 0.320 | <b>0.016</b> |
| <i>trzN</i>   | Herbicides         | 0.725              | 0.329              | 0.752        | 0.835        | 0.502 | <b>0.042</b> |
| <i>alkJ</i>   | Hydrocarbons       | 0.978              | <b>0.008</b>       | 0.799        | 0.741        | 0.866 | 0.896        |
| <i>linC</i>   | Pesticides         | 0.390              | 0.735              | <b>0.001</b> | <b>0.012</b> | 0.077 | 0.548        |

## C. Supporting Figures

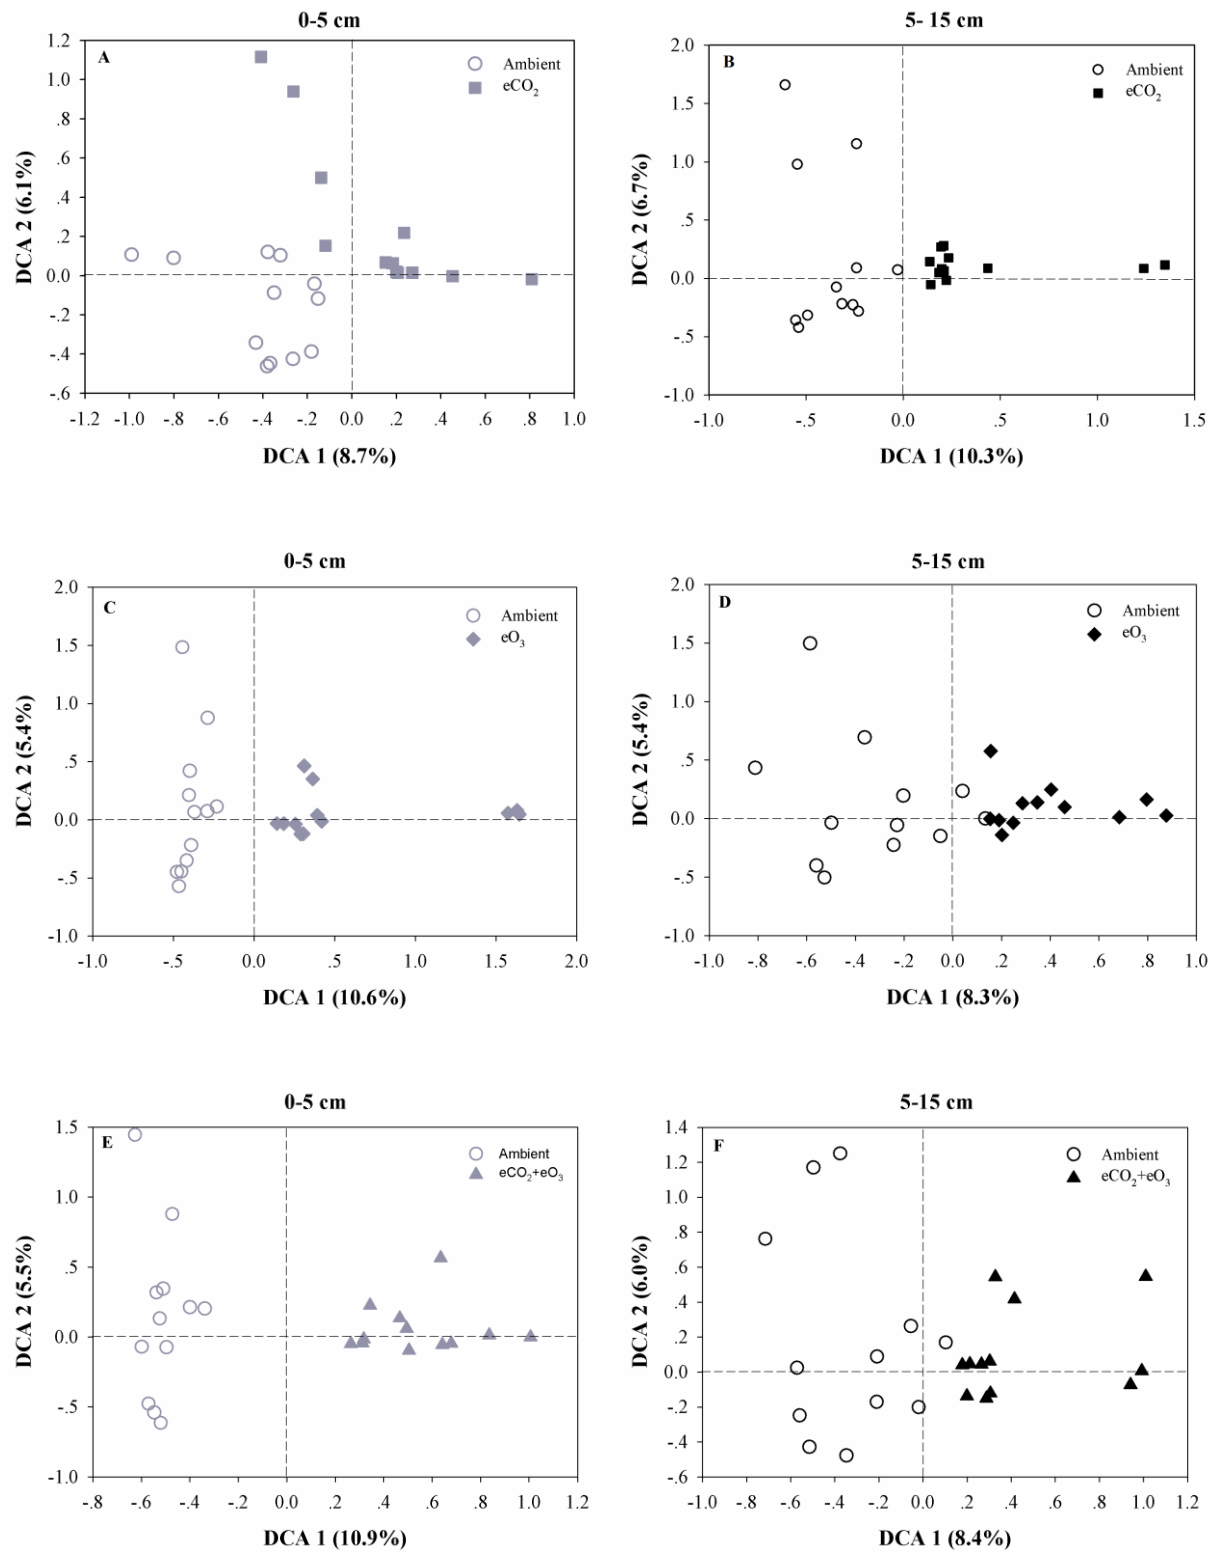

**Fig. S1** Detrended corresponding analysis (DCA) of  $e\text{CO}_2$  (A and B),  $e\text{O}_3$  (C and D), and  $e\text{CO}_2+e\text{O}_3$  (E and F) effects on the microbial community structure of both surface soil (A, C and E) and subsoil (B, D and F) samples.

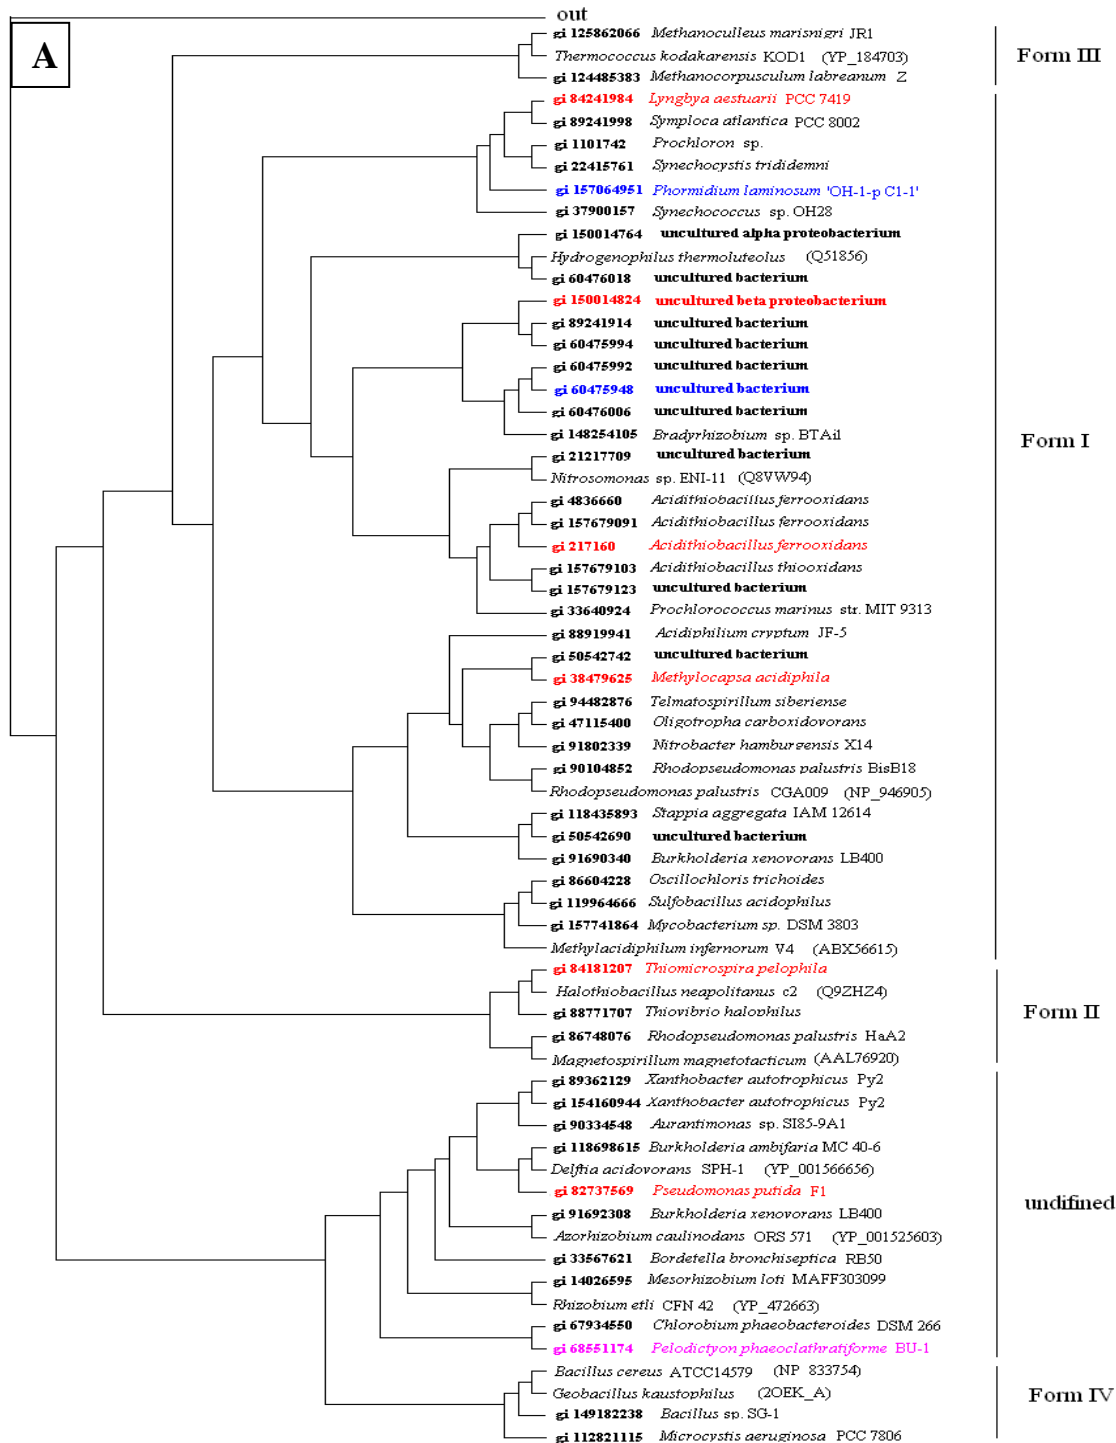

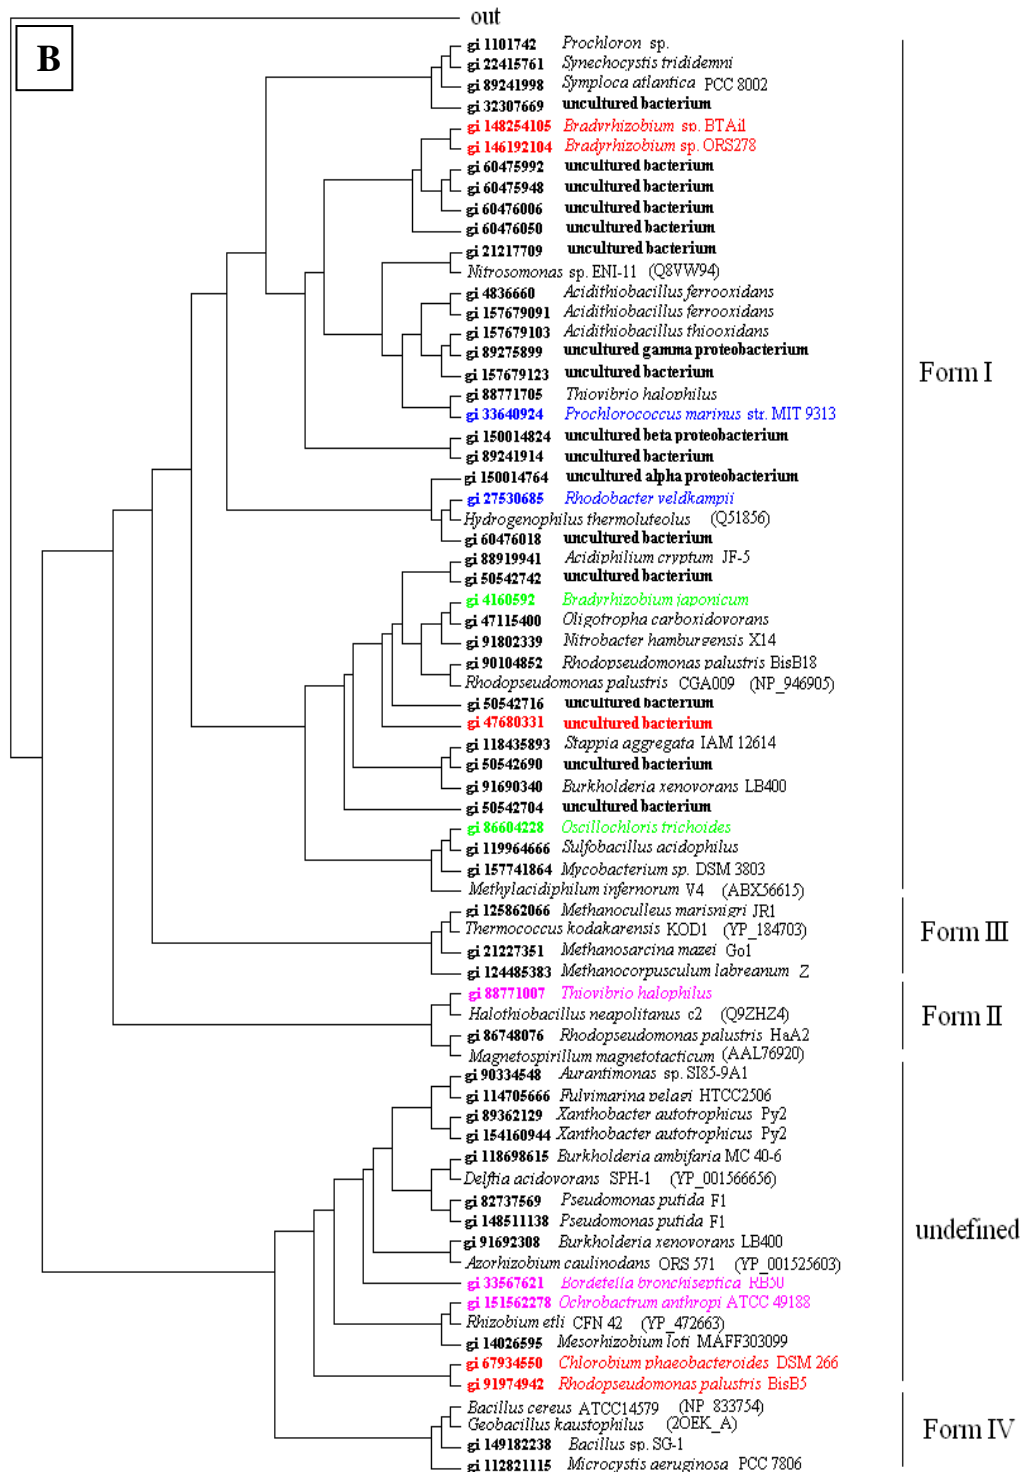

**Fig. S2** Maximum-likelihood phylogenetic tree of Rubisco gene sequences detected by GeoChip 3.0. The phylogenetic relationship was shown among the five Rubisco forms; the reference sequences from GenBank are showed in regular with accession numbers, while the detected genes were showed in bold with the gene ID. **A.** 52 Rubisco gene sequences were detected in surface soil samples, and blue, red and pink colors are represented as unique genes at  $eCO_2$ ,  $eO_3$  and  $eCO_2+eO_3$ , respectively; **B.** 59 Rubisco gene sequences were detected in subsoil samples, and green, blue, red and purple colors represented unique genes in ambient,  $eCO_2$ ,  $eO_3$  and  $eCO_2+eO_3$ , respectively.

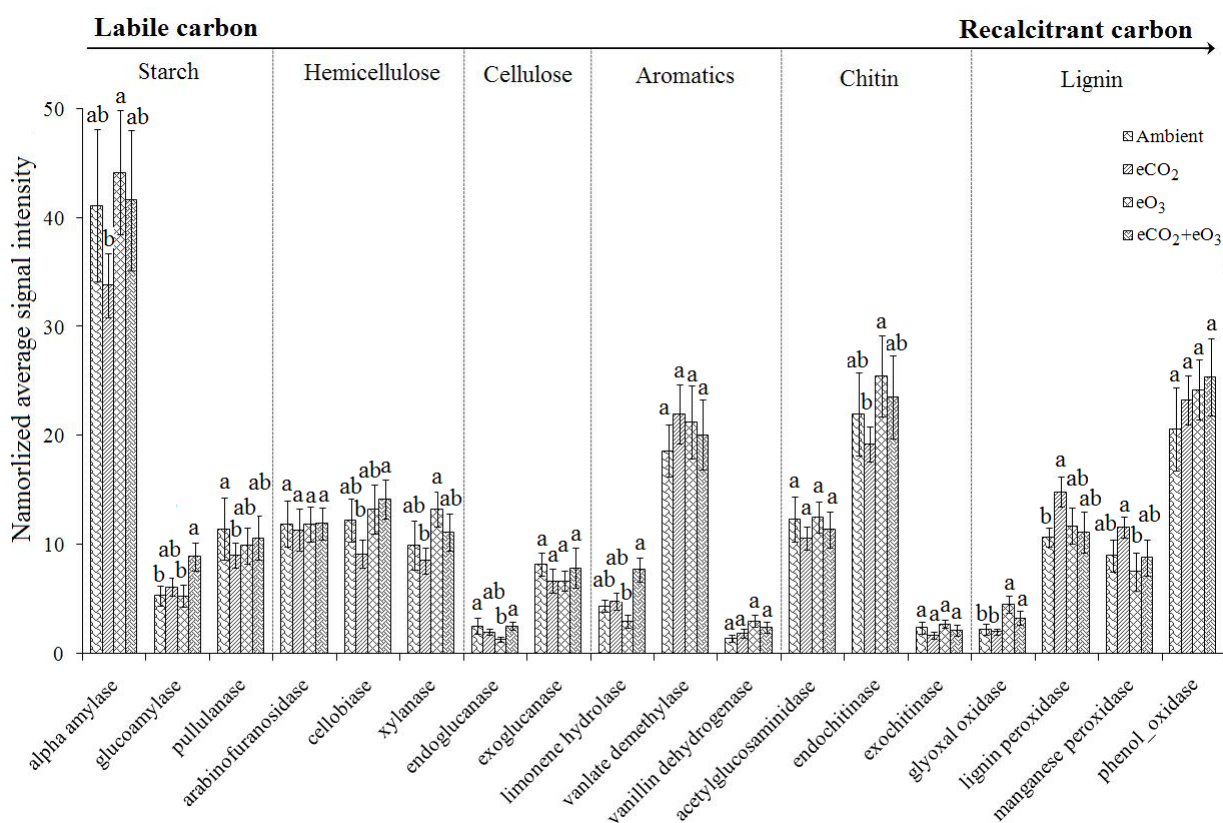

**Fig. S3** Effects of eCO<sub>2</sub>, eO<sub>3</sub>, and eCO<sub>2</sub>+eO<sub>3</sub> on carbon degradation genes detected in the subsoil samples. The complexity of carbon is presented in the order from labile to recalcitrant. All data are presented as mean ± SE. Significance among the treatments was analyzed by multi-way ANOVA.

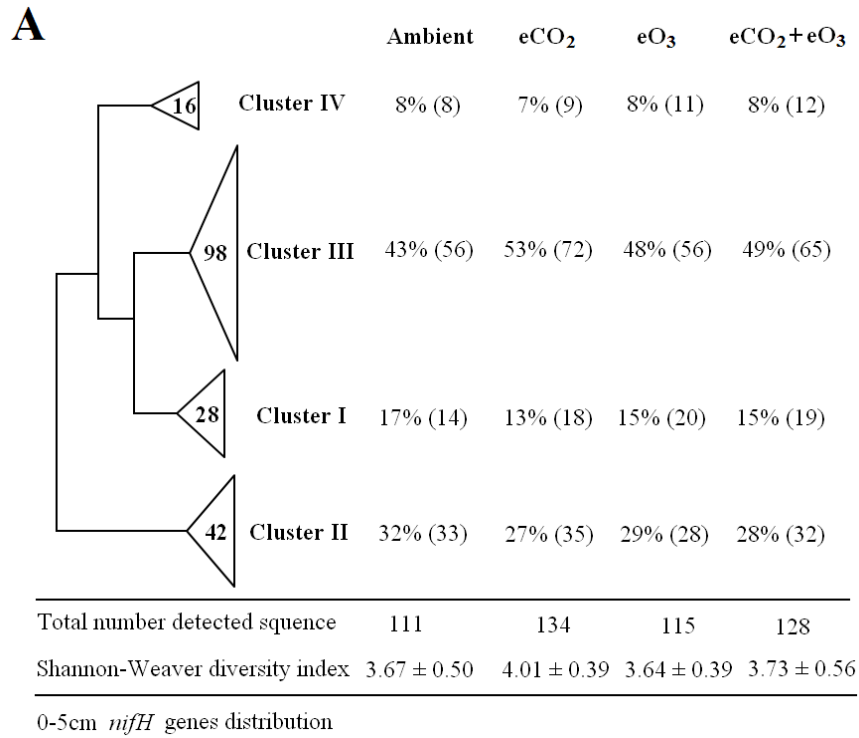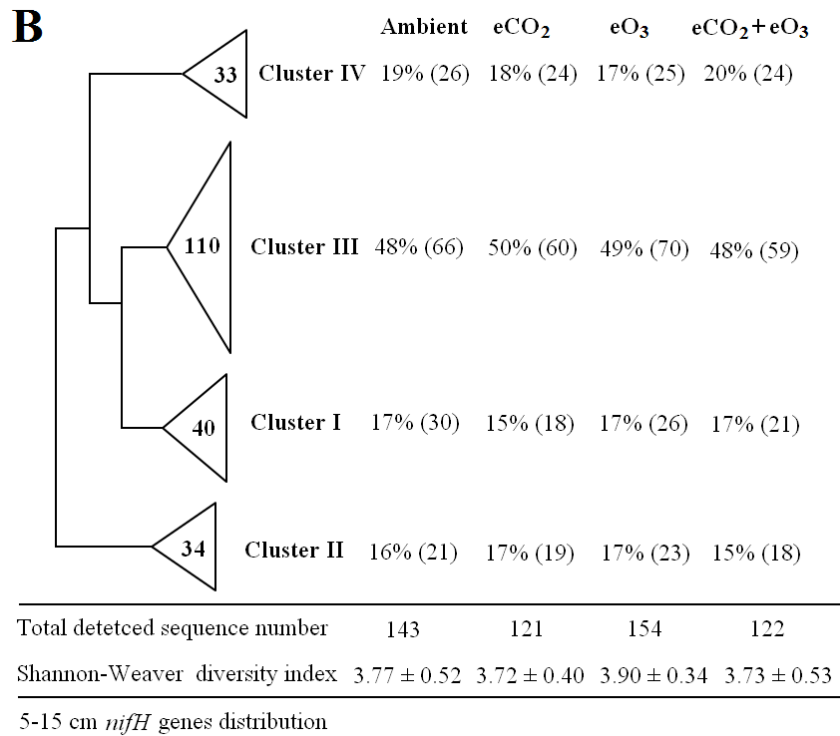

**Fig. S4** Simplified maximum-likelihood phylogenetic tree of *nifH* gene sequences detected by GeoChip 3.0. **A.** 186 *nifH* gene sequences from surface samples. **B.** 217 *nifH* gene sequences from subsoil samples. The width of each wedge is the number of *nifH* sequences within each cluster. The percentages and numbers in bracket are the signal proportions and detected sequences in each cluster within each treatment, respectively. The significant differences of gene abundance were analyzed by ANOVA. The bottom of each tree shows the detected gene numbers and diversity indices.

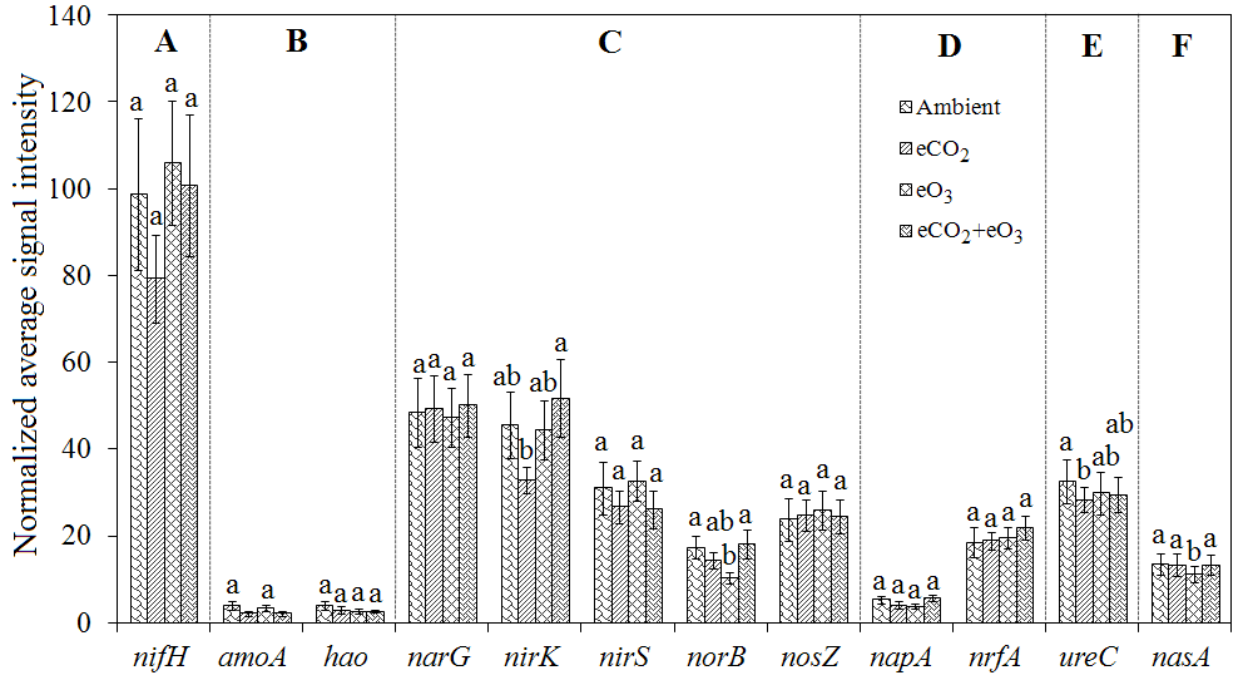

**Fig. S5** Normalized signal intensities of key N cycling genes under eCO<sub>2</sub>, eO<sub>3</sub>, and eCO<sub>2</sub>+eO<sub>3</sub> and control conditions in the subsoil (5-15 cm). (A) N<sub>2</sub> fixation, *nifH* encoding nitrogenase; (B) Nitrification, *amoA* encoding ammonia monooxygenase; (C) Denitrification, including *narG* for nitrate reductase, *nirS* and *nirK* for nitrite reductase, *norB* for nitric oxide reductase and *nosZ* for nitrous oxide reductase; (D) Dissimilatory N reduction to ammonium, including *napA* for nitrate reductase and *nrfA* for c-type cytochrome nitrite reductase; (E). Ammonification, including *gdh* for glutamate dehydrogenase and *ureC* encoding urease; (F) Assimilatory N reduction, *nasA* encoding nitrate reductase. All data are presented as mean  $\pm$  SE. Significance among the treatments was analyzed by multi-way ANOVA.

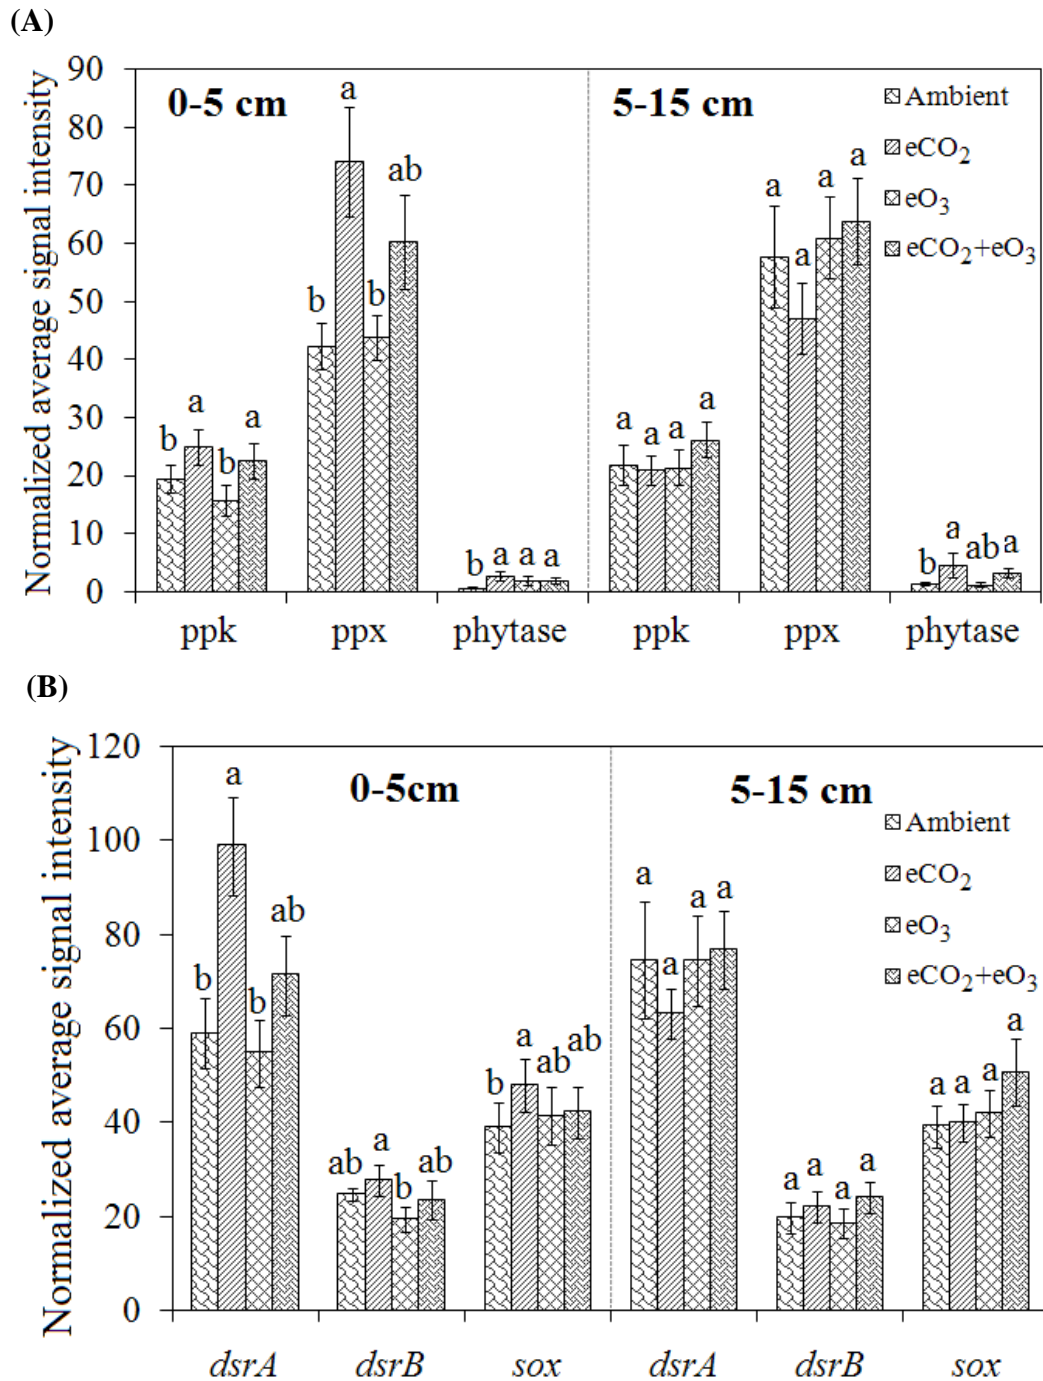

**Fig. S6** The normalized signal intensities of key P cycling genes (A) and Key S cycling genes (B) detected from surface soil (0-5 cm) and subsoil (5-15 cm) samples. Ppx, exopolyphosphatase for inorganic polyphosphate degradation; Ppk, polyphosphate kinase for polyphosphate biosynthesis in prokaryotes, and phytase for phytate degradation. *dsrA* and *dsrB* are the genes for subunits of sulfite reductase for sulfur reduction, and *sox* is the genes for sulfur oxidation. All data are presented as mean  $\pm$  SE. Significance among the treatments was analyzed by multi-way ANOVA.

## D. Supporting reference cited

- Ahn S, Costa J, Emanuel J (1996). PicoGreen quantitation of DNA: effective evaluation of samples pre- or post-PCR. *Nucl Acids Res* **24**: 2623-2625.
- Anderson MJ (2001). A new method for non-parametric multivariate analysis of variance. *Austral Ecol* **26**: 32-46.
- Borcard D, Legendre P, Drapeau P (1992). Partialling out the Spatial Component of Ecological Variation. *Ecology* **73**: 1045-1055.
- Clarke KR (1993). Nonparametric Multivariate Analyses of Changes in Community Structure. *Aust J Ecol* **18**: 117-143.
- He Z, Zhou J (2008). Empirical evaluation of a new method for calculating signal-to-noise ratio for microarray data analysis. *Appl Environ Microbiol* **74**: 2957-2966.
- He Z, Deng Y, Van Nostrand JD, Tu Q, Xu M, Hemme CL *et al* (2010a). GeoChip 3.0 as a high-throughput tool for analyzing microbial community composition, structure and functional activity. *ISME J* **4**: 1167-1179.
- He Z, Xu M, Deng Y, Kang S, Kellogg L, Wu L *et al* (2010b). Metagenomic analysis reveals a marked divergence in the structure of belowground microbial communities at elevated CO<sub>2</sub>. *Ecol Lett* **13**: 564-575.
- Hill MO, Gauch HG (1980). Detrended Correspondence-Analysis - an Improved Ordination Technique. *Vegetatio* **42**: 47-58.
- LACHAT (1994). QuickChem Method 12-107-04-1-B. LACHAT Instrument: Milwaukee, WI.
- Liang Y, He Z, Wu L, Deng Y, Li G, Zhou J (2010). Development of a common oligonucleotide reference standard for microarray data normalization and comparison across different microbial communities. *Appl Environ Microbiol* **76**: 1088-1094.
- McCune B, Grace JB (2002). *Analysis of ecological communities*. MjM Software Design: Gleneden Beach, OR.
- Morgan PB, Bollero GA, Nelson RL, Dohleman FG, Long SP (2005). Smaller than predicted increase in aboveground net primary production and yield of field-grown soybean under fully open-air [CO<sub>2</sub>] elevation. *Glob Change Biol* **11**: 1856-1865.
- Nelson DW, Sommers LE (1996). Total carbon, organic carbon, and organic matter. In: Sparks DL, Page AL, Helmke PA, Loeppert RH, Soltanpour PN, Tabatabai MA *et al* (eds). *Methods of Soil Analysis*. Soil Science Society of America: Madison, WI. pp 961-1010.
- Peralta A, Wander M (2008). Soil organic matter dynamics under soybean exposed to elevated CO<sub>2</sub>. *Plant Soil* **303**: 69-81.
- Pujol Pereira EI, Chung H, Scow K, Sadowsky MJ, van Kessel C, Six J (2011). Soil nitrogen transformations under elevated atmospheric CO<sub>2</sub> and O<sub>3</sub> during the soybean growing season. *Environ Pollu* **159**: 401-407.
- R Development Core Team (2011). R: A language and environment for statistical computing. R Foundation for Statistical Computing, Vienna, Austria.
- Twine TE, Bryant JJ, Richter K, Bernacchi CJ, McConnaughay KD, Morris SJ *et al* (2013). Impacts of elevated CO<sub>2</sub> concentration on the productivity and surface energy budget of the soybean and maize agroecosystem in the Midwest U.S. *Glob Change Biol* (**in press**).

- Wu L, Liu X, Schadt CW, Zhou J (2006). Microarray-based analysis of subnanogram quantities of microbial community DNAs by using whole-community genome amplification. *Appl Environ Microbiol* **72**: 4931-4941.
- Zhou J, Bruns MA, Tiedje JM (1996). DNA recovery from soils of diverse composition. *Appl Environ Microbiol* **62**: 316-322.
